# Supplementary material
Source: PubMed Central journal article supplement (PMC6887100)

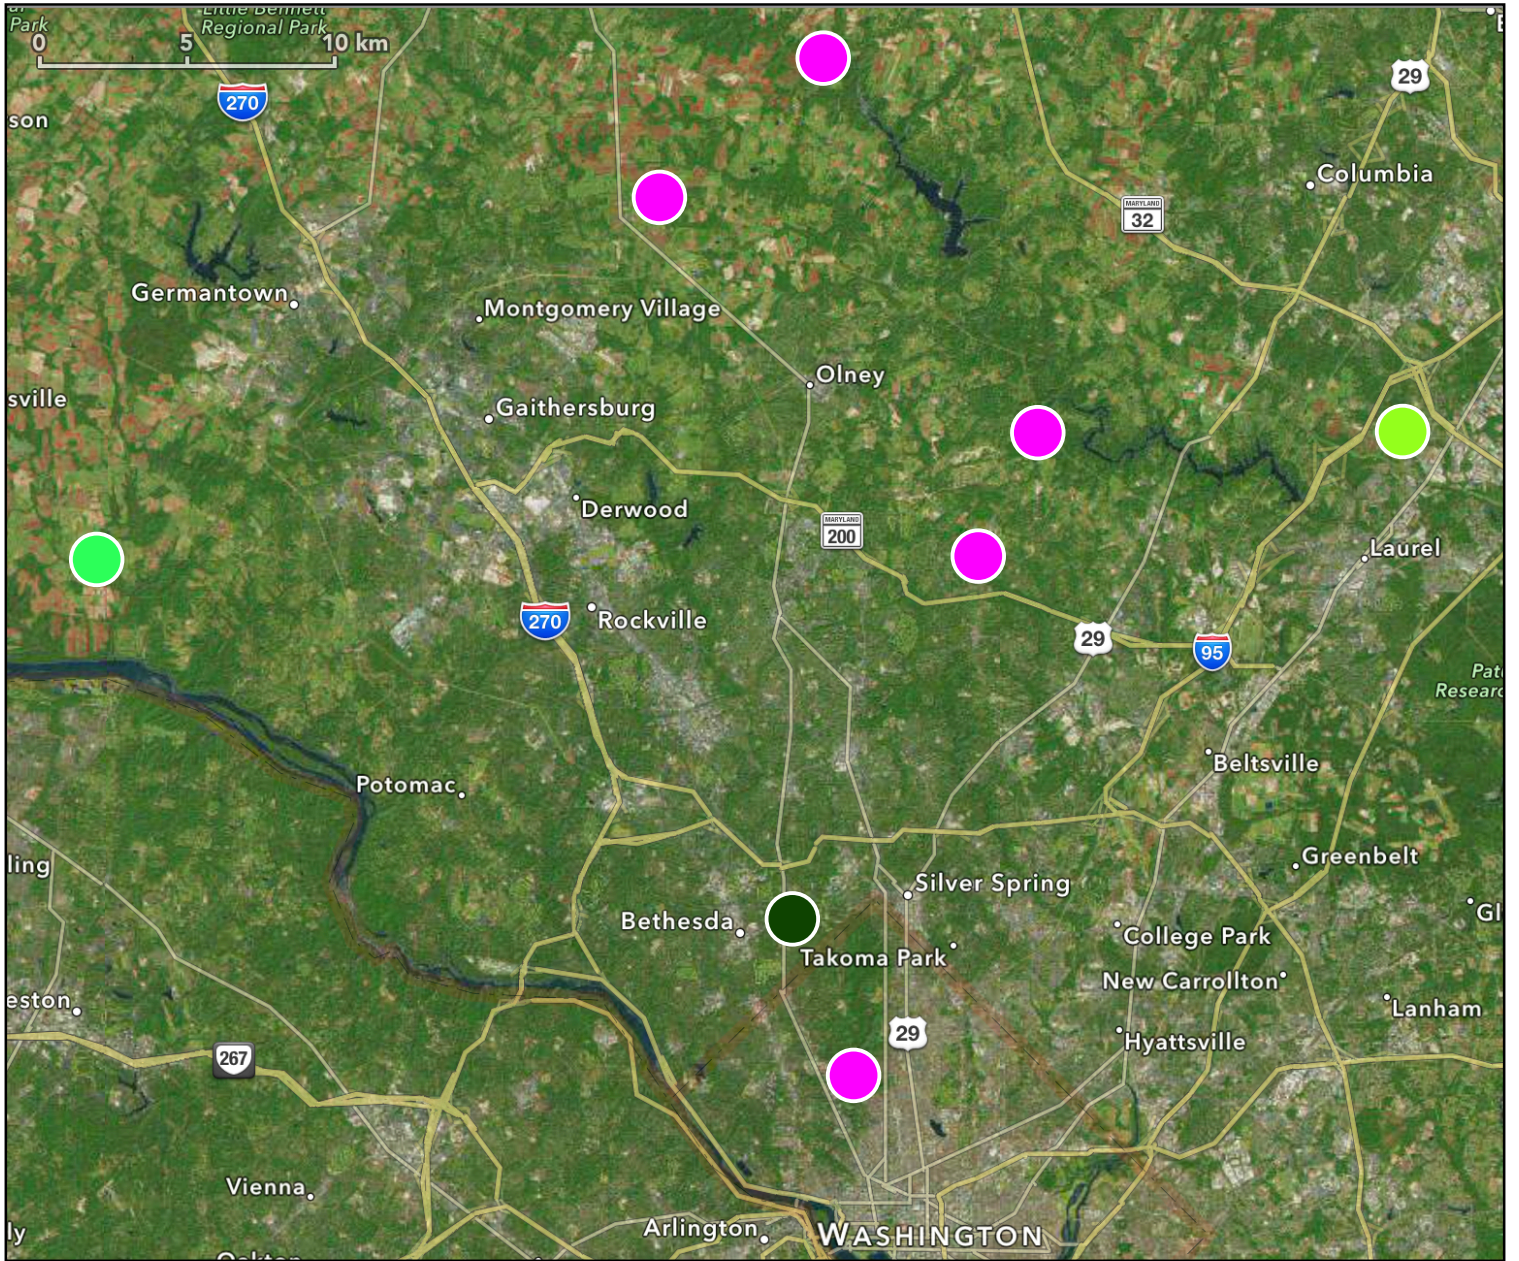

Supplement: NIHMS1512193-supplement-1.pdf [file NIHMS1512193-supplement-1.pdf]

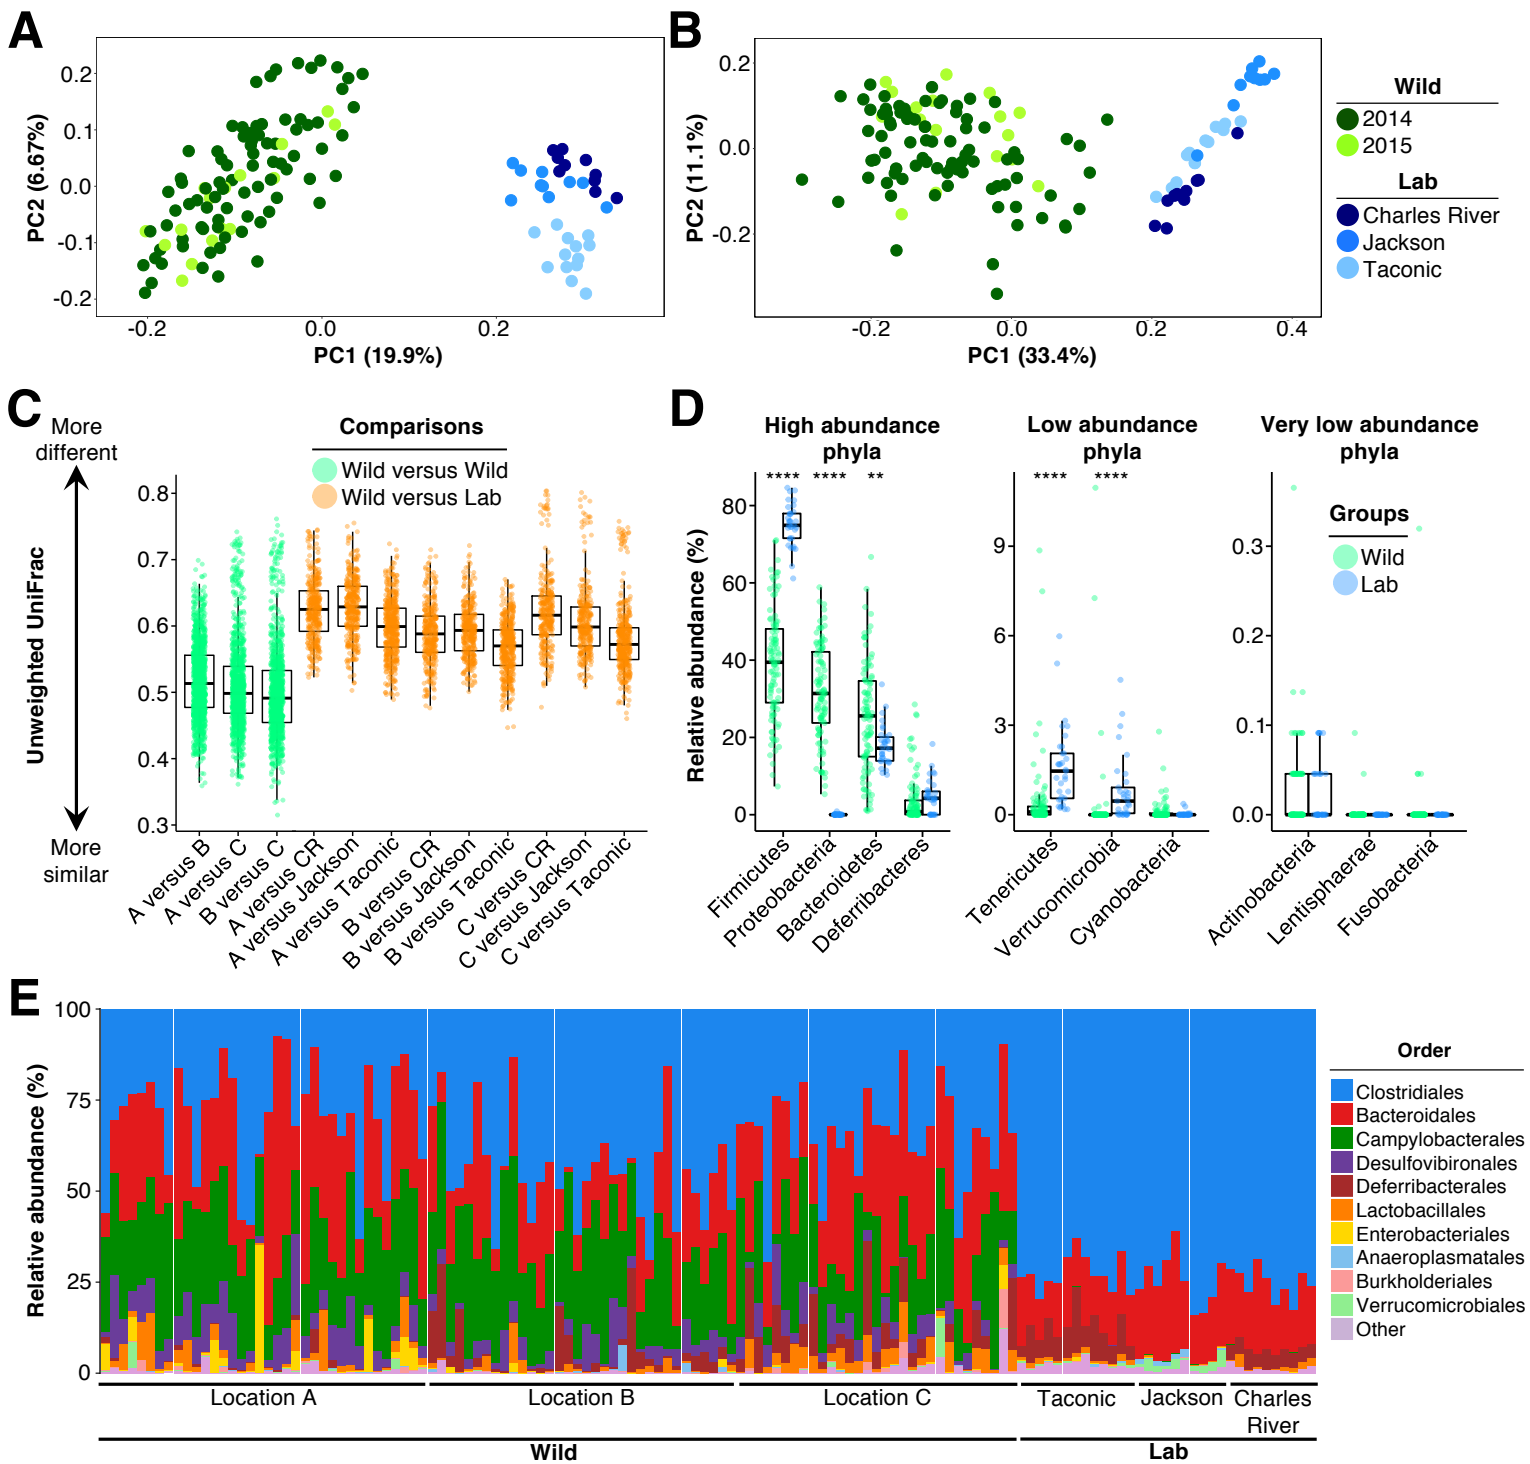

Supplement: NIHMS1512193-supplement-2.pdf [file NIHMS1512193-supplement-2.pdf]

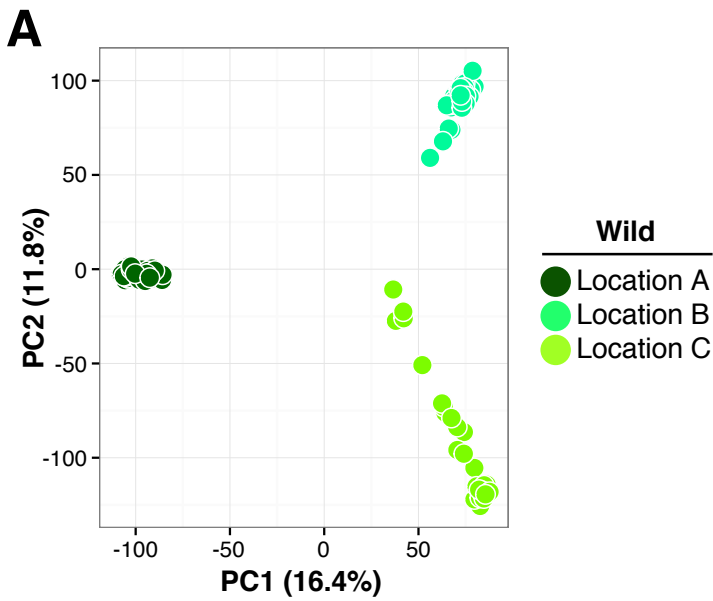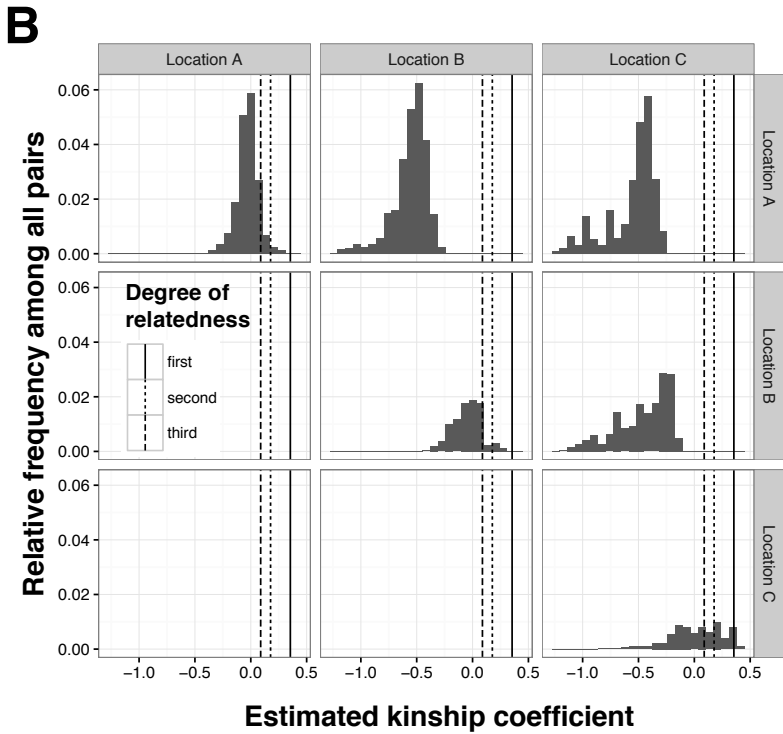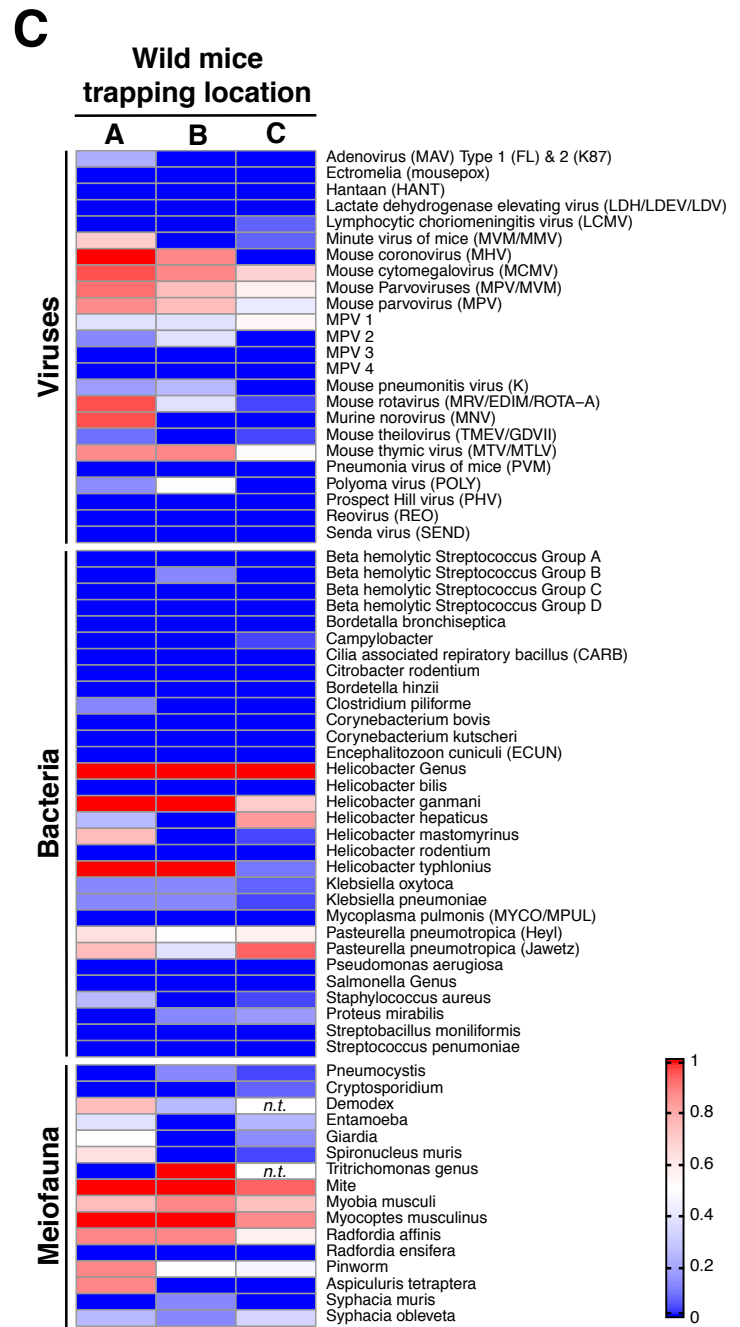

Supplement: NIHMS1512193-supplement-3.pdf [file NIHMS1512193-supplement-3.pdf]

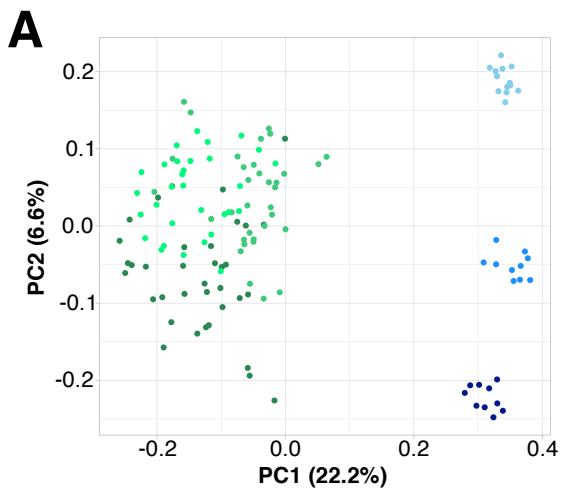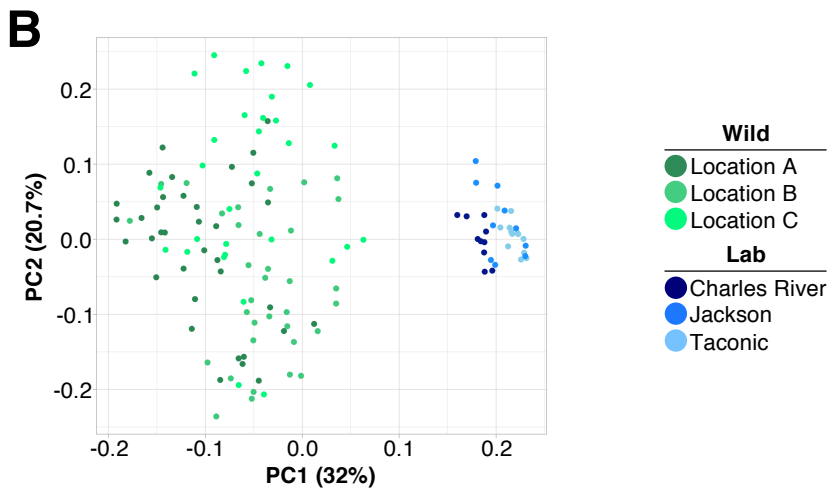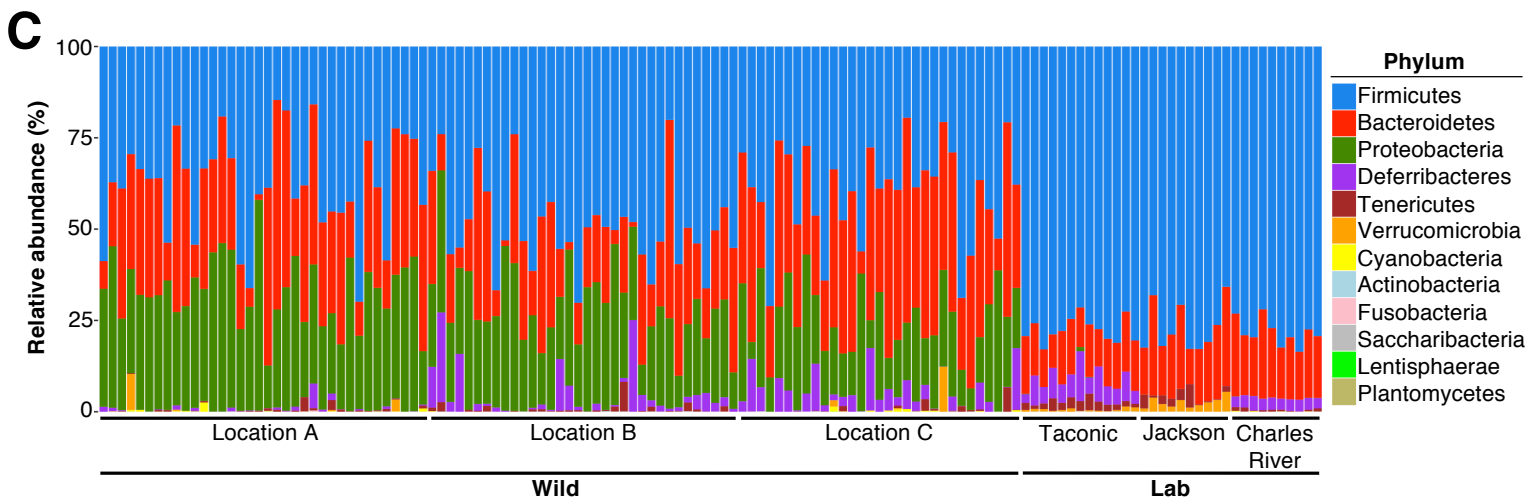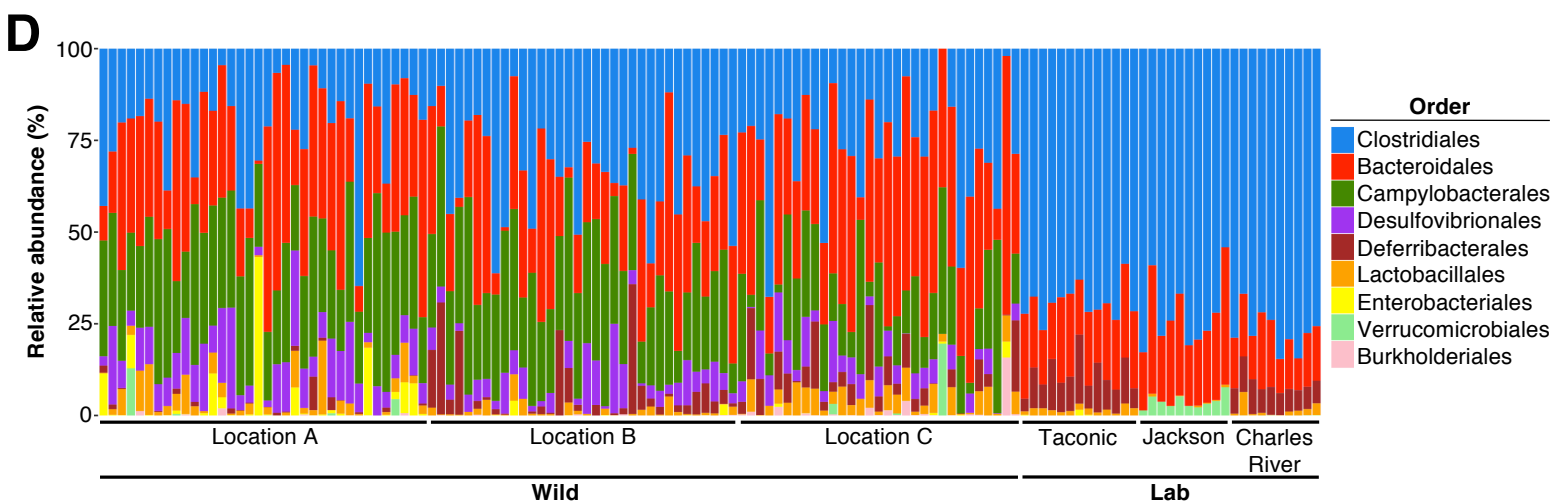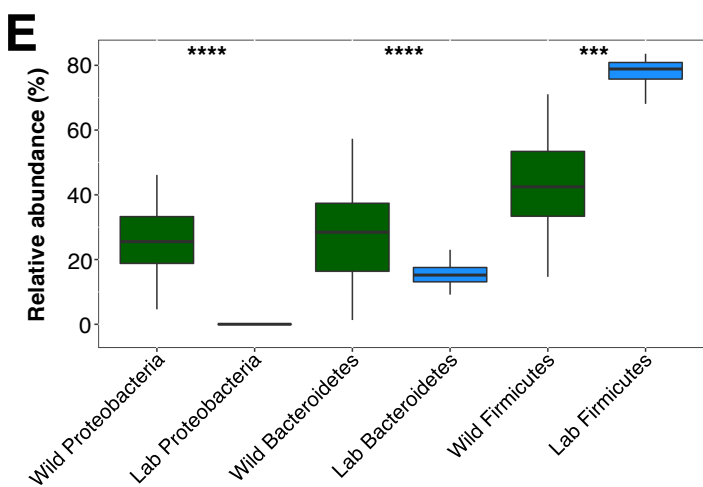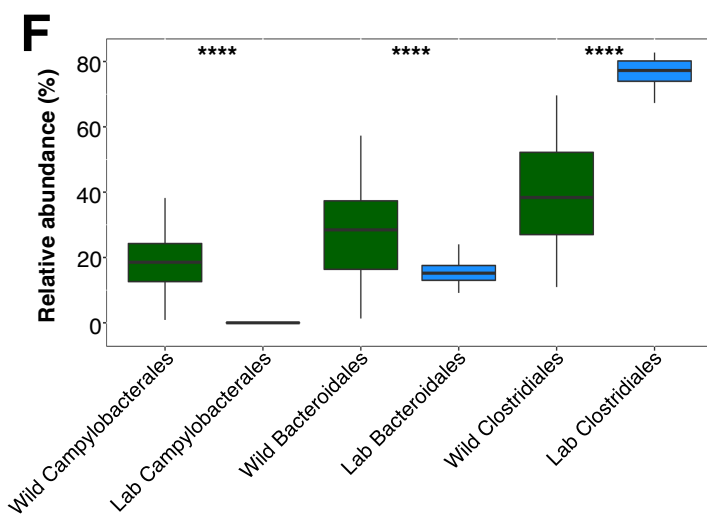

Supplement: NIHMS1512193-supplement-4.pdf [file NIHMS1512193-supplement-4.pdf]

**A**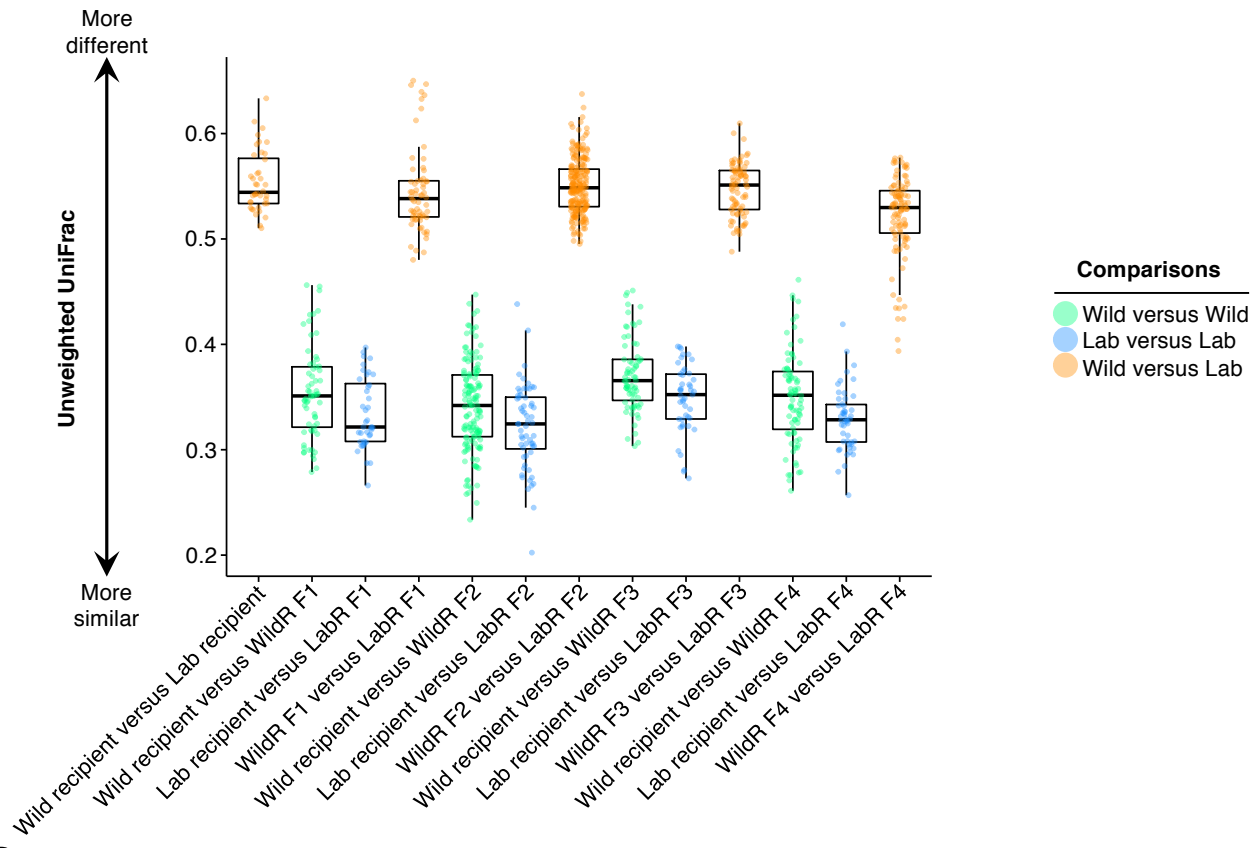**B**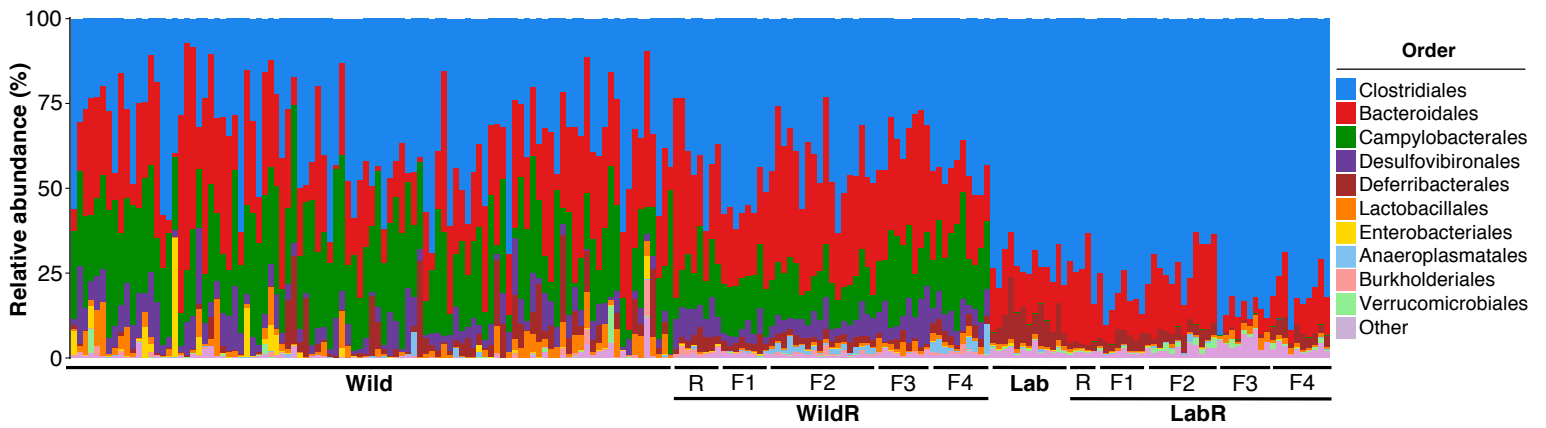

Supplement: NIHMS1512193-supplement-5.pdf [file NIHMS1512193-supplement-5.pdf]

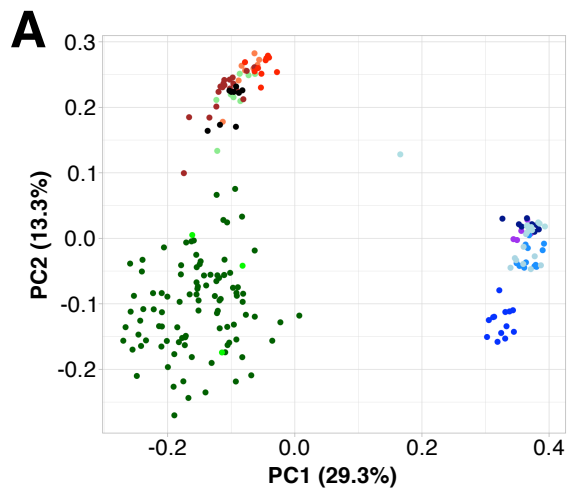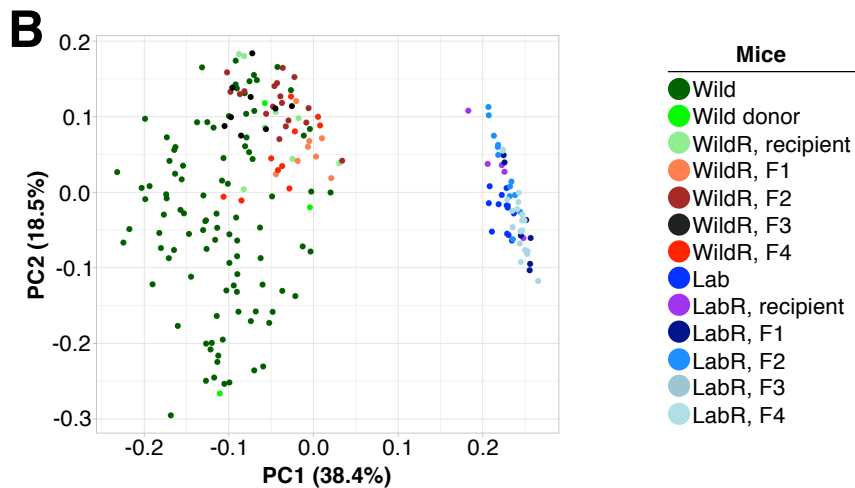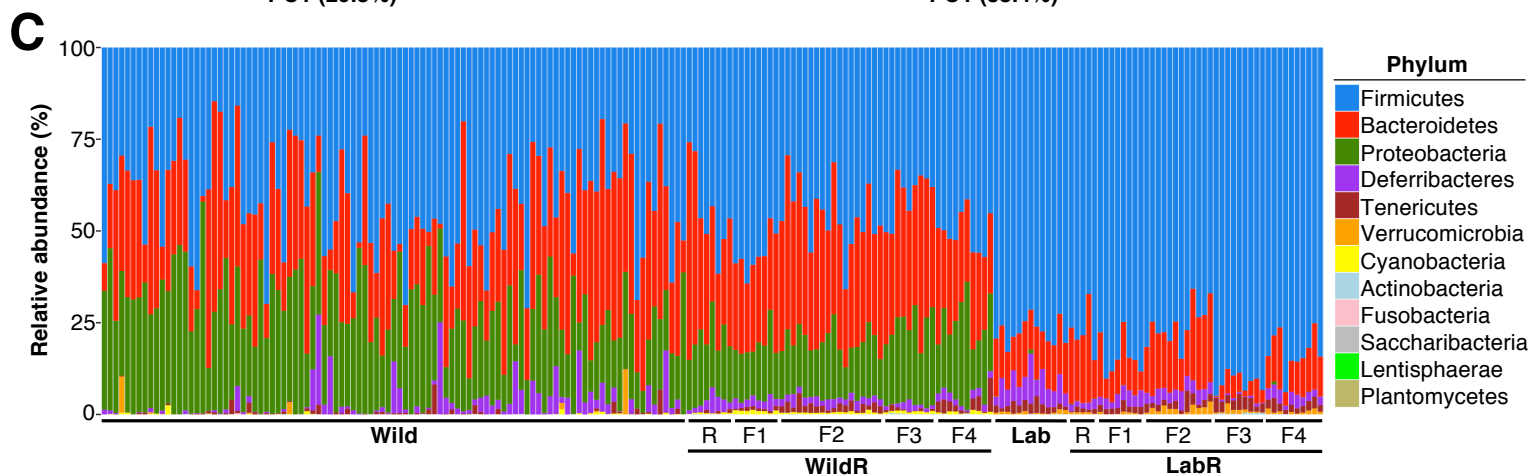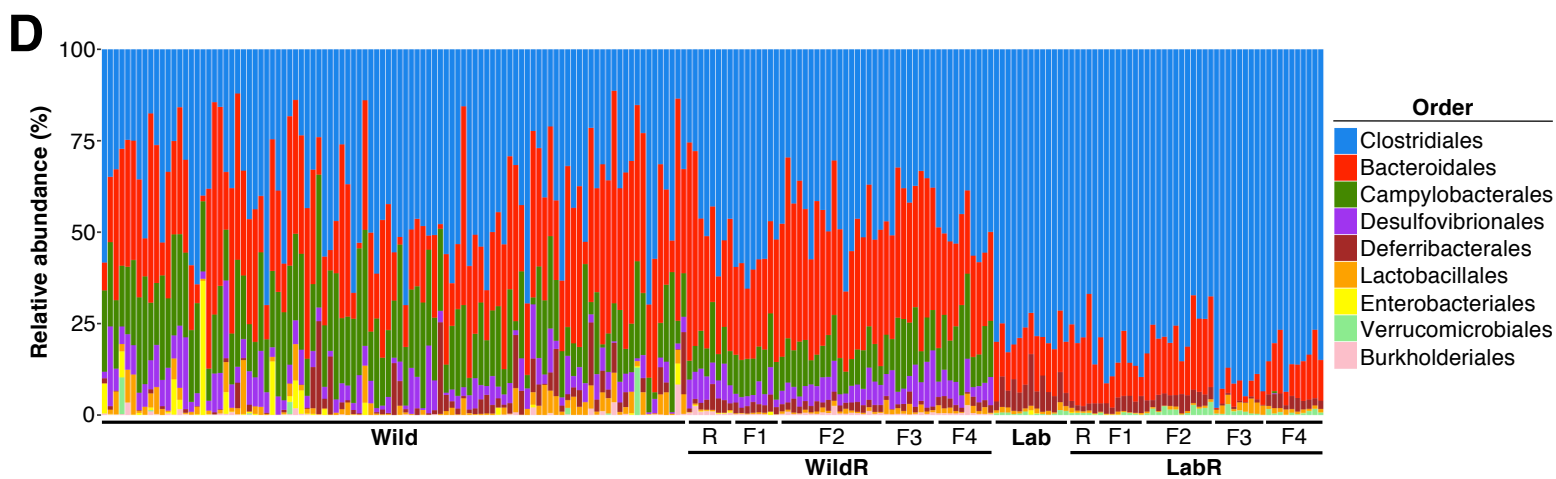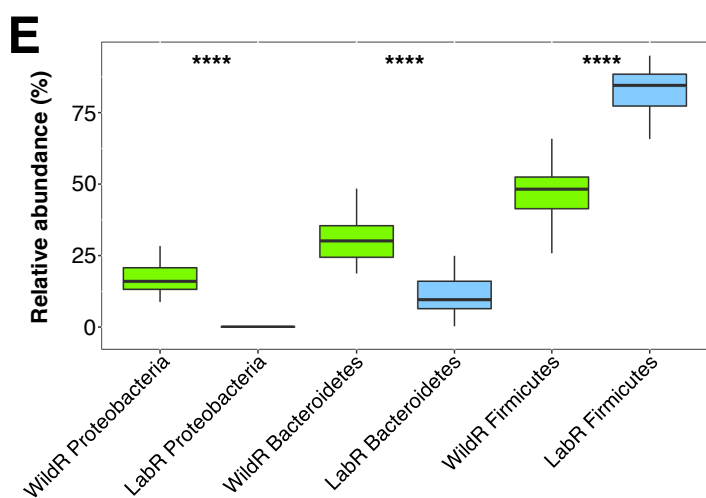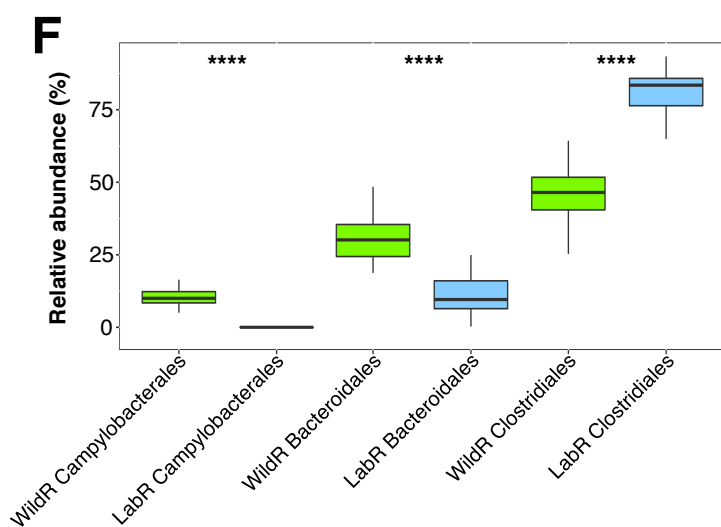

Supplement: NIHMS1512193-supplement-6.pdf [file NIHMS1512193-supplement-6.pdf]

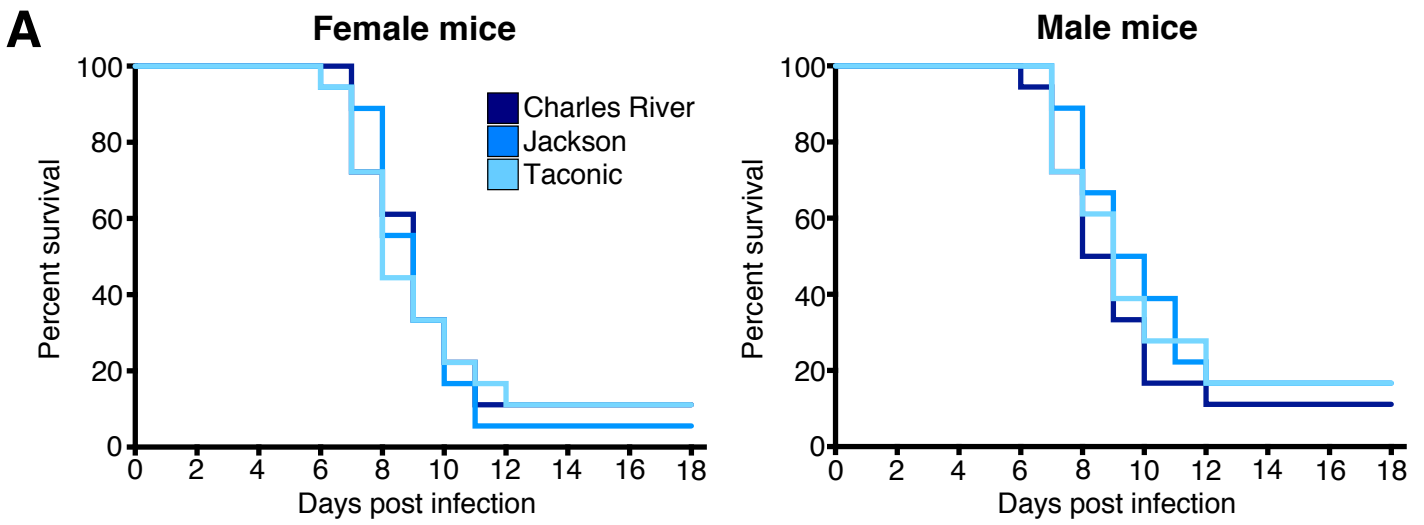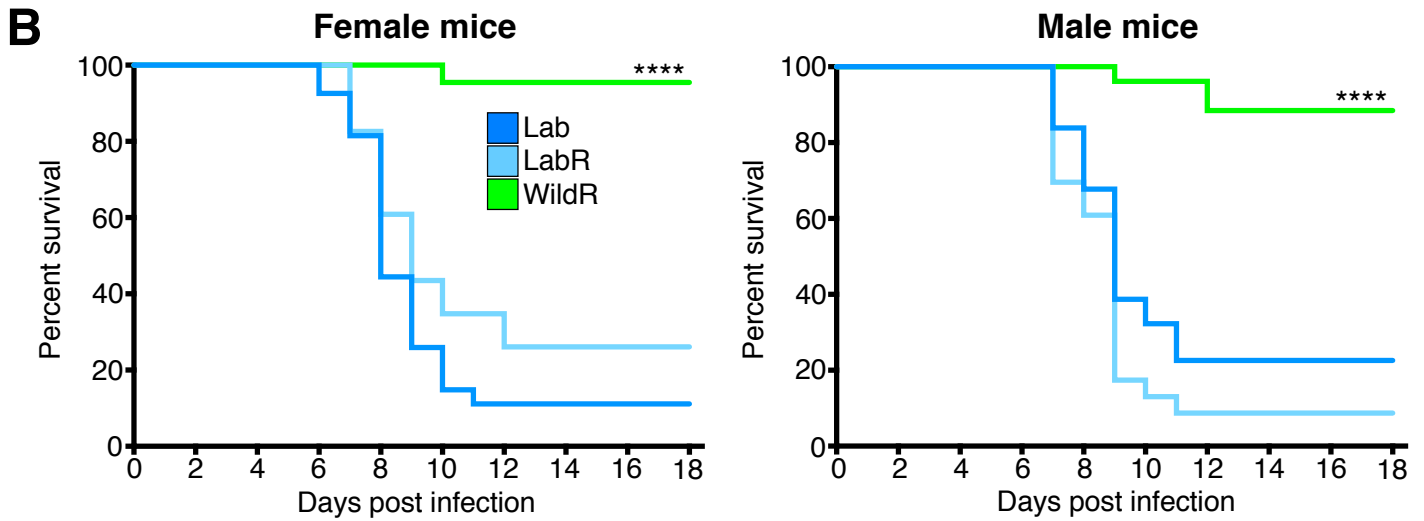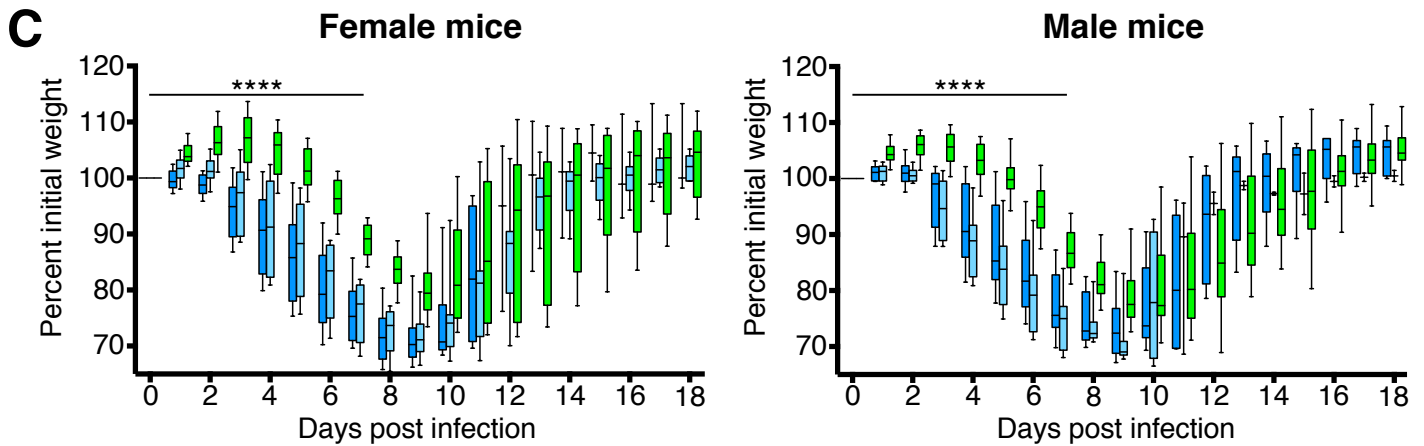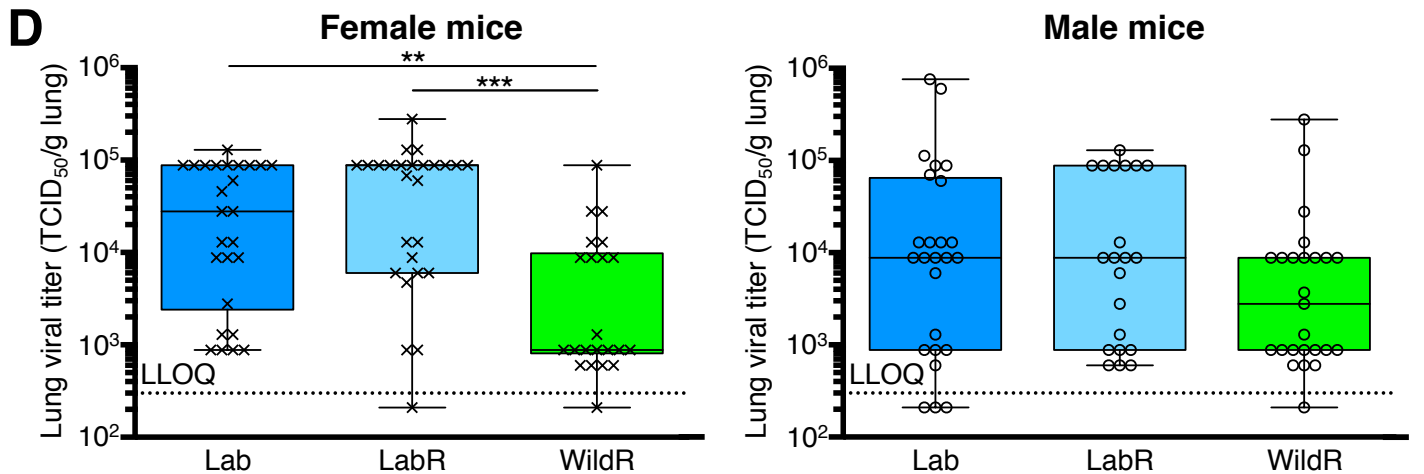

Supplement: NIHMS1512193-supplement-7.pdf [file NIHMS1512193-supplement-7.pdf]
